# Supplementary material
Source: Springer Nature journal article supplement (https://www.springermedizin.de/resource/supplementary/12958_2012_1031_MOESM6_ESM.pdf/9566636)

(A)

## Eutopic-to-ectopic

| Gene<br>Symbol | Fold Change |         |
|----------------|-------------|---------|
|                | Stage 3     | Stage 4 |
| LAMC2          | 4.3         | 3.5     |
| RASEF          | 3.7         | 6.9     |
| TACSTD2        | 3.1         | 3.1     |

| Gene<br>Symbol | Fold Change   |           |
|----------------|---------------|-----------|
|                | Proliferative | Secretory |
| EGR3           | 3.7           | -3.4      |
| ERBB3          | 3.2           | 3.7       |
| LAMC2          | 3.4           | 5.7       |
| MATN4          | 3.1           | 5.1       |

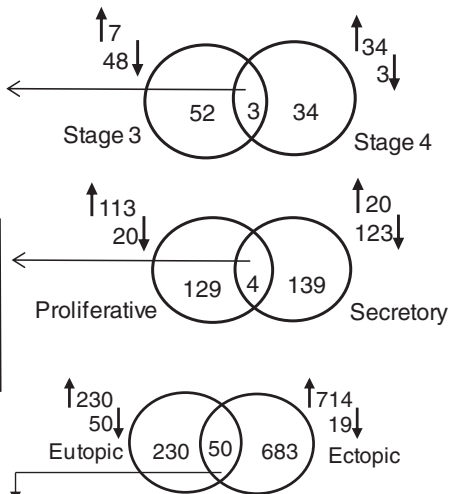

(B)

## Clinical stages 3-to-4

| Gene<br>Symbol | Fold Change |         | Gene<br>Symbol | Fold Change |         | Gene<br>Symbol | Fold Change |         |
|----------------|-------------|---------|----------------|-------------|---------|----------------|-------------|---------|
|                | Eutopic     | Ectopic |                | Eutopic     | Ectopic |                | Eutopic     | Ectopic |
| ALAS1          | -5.9        | 13.7    | FAM93B         | 17.9        | 10.8    | PPFIA1         | 4.9         | 6.4     |
| ALDH1L2        | 14.2        | 14.8    | FAM154B        | 6.0         | 13.6    | PRR5           | -5.6        | -7.3    |
| ALMS1P         | 7.6         | 7.9     | FBXO9          | 6.0         | 10.2    | RBMX           | 6.4         | 6.3     |
| AP1B1          | 12.9        | 6.8     | FLOT1          | 9.2         | 9.3     | RFX5           | 7.7         | 7.5     |
| C1QTNF3        | 7.0         | 7.1     | GJC3           | 9.1         | 19.9    | S1PR5          | 7.3         | 15.5    |
| C11orf64       | 17.4        | 20.9    | GK5            | 5.2         | 5.3     | SOCS5          | 9.5         | 9.9     |
| C6orf          | 10.9        | 33.2    | GOT2           | 7.1         | 6.1     | STAT2          | 6.4         | 5.6     |
| C20orf12       | 4.7         | 3.8     | HDHD1A         | 6.1         | 3.7     | TBCEL          | 5.9         | 6.3     |
| CALCOCO2       | 4.5         | 6.1     | KCNK12         | 15.5        | 9.3     | TP53INP2       | 3.9         | 8.2     |
| CCNF           | 9.6         | 12.8    | KRT222         | 6.0         | 10.3    | WBSCR17        | 5.4         | 3.8     |
| CCNT2          | 4.0         | 5.6     | MAGEA10        | 9.5         | 13.1    | ZNF135         | 9.0         | 4.4     |
| CSRNP1         | 5.5         | 14.4    | NFIB           | 6.9         | 8.3     | ZNF257         | 7.8         | 17.7    |
| DAGLB          | 3.1         | 6.5     | NOB1           | 5.0         | 6.0     | ZNF274         | 6.3         | 15.2    |
| DNAH7          | 7.5         | 14.2    | NOS1AP         | 12.9        | 13.8    | ZNF343         | 4.7         | 9.0     |
| EAF1           | 6.9         | 12.8    | NRM            | 6.7         | 4.0     | ZNF551         | 3.9         | 4.4     |
| EFCAB6         | 7.9         | 16.8    | NT5C1B         | 16.5        | 34.0    | ZRANB2         | 4.1         | 6.0     |
| EVC2           | 7.2         | 7.8     | PKNOX2         | 5.2         | 8.1     |                |             |         |

(C)

## Proliferative-to-secretory phases

| Gene<br>Symbol | Fold Change |         |
|----------------|-------------|---------|
|                | Eutopic     | Ectopic |
| ADAM8          | -3.6        | -3.1    |
| DCAF4          | 3.5         | -3.3    |
| PDLIM5         | -3.7        | -3.9    |
| UGDH           | 4.9         | -3.9    |

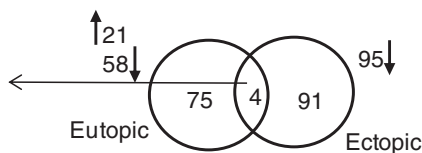

Supplement: MOESM6 [file 9566636]
